# Supplementary material for: Combining satellite observations to develop a global soil moisture product for near-real-time applications
Source: Copernicus journal article supplement (doi:10.5194/hess-20-4191-2016), 2016-10-17
Supplement: Supplementary file 1 [file hess-20-4191-2016-supplement.zip]

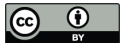

## *Supplement of*

# **Combining satellite observations to develop a global soil moisture product for near-real-time applications**

**Markus Enenkel et al.**

*Correspondence to:* Markus Enenkel ([menenkel@iri.columbia.edu](mailto:menenkel@iri.columbia.edu))

- [hess-20-4191-2016-supplement-title-page.pdf](#)
- [Fig.1.png](#)
- [Fig.2.png](#)
- [Fig.3.png](#)
- [Fig.4.png](#)
- [Fig.5.png](#)
- [Fig.6.png](#)
- [Fig.A7.png](#)
- [Fig.B10.png](#)
- [Fig.B11.png](#)
- [Fig.B12.png](#)
- [Fig.B8.png](#)
- [Fig.B9.png](#)
- [Fig.C13.png](#)
- [Fig.C14.png](#)
- [\\_\\_MACOSX](#)
  - [\\_Fig.1.png](#)
  - [\\_Fig.2.png](#)
  - [\\_Fig.3.png](#)
  - [\\_Fig.4.png](#)

- .\_Fig.5.png
- .\_Fig.6.png
- .\_Fig.A7.png
- .\_Fig.B10.png
- .\_Fig.B11.png
- .\_Fig.B12.png
- .\_Fig.B8.png
- .\_Fig.B9.png
- .\_Fig.C13.png
- .\_Fig.C14.png

The copyright of individual parts of the supplement might differ from the CC-BY 3.0 licence.
